# 1 Pre-existing Technological Core and Roots for the CRISPR Breakthrough

2  
3 Christopher L. Magee<sup>12\*</sup>, Patrick W. Kleyn<sup>34</sup>, Brendan M. Monks<sup>5</sup>, Ulrich Betz<sup>5</sup>, Subarna Basnet<sup>6</sup>

4  
5  
6  
7  
8  
9  
10  
11  
12  
13  
14  
15  
16  
17  
18  
19  
20  
21  
22  
23  
24  
25  
26  
27  
28  
29  
30  
31  
32

---

<sup>1</sup> Co-director, SUTD-MIT International Design Center, Cambridge, MA, USA

<sup>2</sup> MIT Institute for Data, Systems and Society (IDSS), Cambridge, MA, USA

<sup>3</sup> EMD Serono Research & Development Institute, Billerica, MA, USA

<sup>4</sup> Present Address: Rhythm Pharmaceuticals, Boston, MA, USA

<sup>5</sup> Merck KGaA, Frankfurter Straße 250, Darmstadt, 64293, Germany

<sup>6</sup> SUTD-MIT International Design Center, MIT Cambridge, MA, USA

\*Corresponding author

E-mail: [cmagee@mit.edu](mailto:cmagee@mit.edu)

## 33 Abstract

34 This paper applies objective methods to explore the technological origins of the widely acclaimed  
35 CRISPR breakthrough in the technological domain of genome engineering. Previously developed  
36 patent search techniques are first used to recover a set of patents that well-represent the  
37 genome editing domain before CRISPR. Main paths are then determined from the citation  
38 network associated with this patent set allowing identification of the three major knowledge  
39 trajectories. The most significant of these trajectories for CRISPR involves the core of genome  
40 editing with less significant trajectories involving cloning and endonuclease specific  
41 developments. The major patents on the core trajectory are consistent with qualitative expert  
42 knowledge of the topical area. A second set of patents that we call the CRISPR roots are obtained  
43 by finding the patents directly cited by the recent CRISPR patents along with patents cited by that  
44 set of patents. We find that the CRISPR roots contain 8 key patents from the genome engineering  
45 main path associated with restriction endonucleases and the expected strong connection of  
46 CRISPR to prior genome editing technology such as Zn finger nucleases. Nonetheless, analysis of  
47 the full CRISPR roots shows that a very wide array of technological knowledge beyond genome  
48 engineering has contributed to achieving the CRISPR breakthrough. Such breadth in origins is not  
49 surprising since “spillover” is generally perceived as important and previous qualitative studies  
50 of CRISPR have shown not only technological breadth in origins but scientific breadth as well. In  
51 addition, we find that the estimated rate of functional performance improvement of the CRISPR  
52 roots set is about 9% per year compared to the genome engineering set (~4 % per year). These  
53 estimates indicate below average rates of improvement and may indicate that CRISPR (and  
54 perhaps yet undiscovered) genome engineering developments could evolve in effectiveness over  
55 an upcoming long rather than short time period.

56

## 57 Introduction

58 Genome engineering has been one of the promising biomedical approaches studied in  
59 the past few decades. Just 5 years ago, CRISPR-Cas9 emerged as a much more economical,  
60 practical and generalizable genome editing technology. Since then it has become popular to refer  
61 to CRISPR as the most important biotechnology breakthrough of the 21<sup>st</sup> century (1) and as one  
62 of the two (PCR being the other) most important biological technologies of the past 50 years (2).

63 Genome engineering is genetic engineering in which DNA is inserted, deleted, modified or  
64 replaced in the genome of a living cell or organism. Since there is not a consensus about  
65 differentiation, we -and most others- use genome editing as a synonym for genome engineering.  
66 There is consensus that CRISPR- an acronym for Clustered Regularly Interspaced Short  
67 Palindromic Repeats -and Cas9 (CRISPR-associated protein 9) is the nomenclature for the  
68 signature protein for type II CRISPR systems that, directed by guide RNAs, cleaves DNA in a  
69 sequence-dependent manner. CRISPR (and Cas9) were discovered in bacteria (3-7) where they  
70 form the backbone for very effective viral resistance systems in numerous species setting the  
71 stage for other uses (8). Lander in a paper retracing the history (9), Doudna and Sternberg in a  
72 memoir and historical book (10) and more recently Urnov (11) all do an excellent job of covering  
73 the *many strands of globally-dispersed scientific work* (including discovery of CRISPR, its role as  
74 an adaptive immune system, experiments confirming the CRISPR role and showing use of a  
75 nuclease, adapting findings from earlier genome editing techniques, sorting out the importance

76 of the various Cas proteins especially Cas9, cRNAs- or CRISPR RNA complexes, discovery of  
77 tracrRNA, reconstituting CRISPR in a distant organism, studying CRISPR in vitro) *essential* to the  
78 initial sets of CRISPR patents. It is particularly interesting that many of these scientific research  
79 studies were undertaken for reasons having no biomedical intention (and often not focused on  
80 CRISPR or genome editing). This scientific story is fundamental to the emergence of CRISPR and  
81 the Lander article, the Doudna and Sternberg book and the Urnov article are recommended if  
82 one wants to understand it (9, 10, 11). This paper does not emphasize the scientific literature but  
83 instead focuses on the patent literature associated with genome editing and CRISPR. We note  
84 that patents do cite scientific papers but scientific papers almost never cite patents so study of  
85 patents is an important element in the emergence and development of any technology. We also  
86 note that there are several legal conflicts about patents in this area and that the growth of  
87 relevant patent applications has “exploded” since 2012. The rapid growth and the legal conflicts  
88 do not—in our judgement—eliminate the usefulness of assessing the technological core and roots  
89 of CRISPR in the patent system.

90 There is extensive development of methods, based upon analysis of patents that are  
91 aimed at improving understanding of technological developments such as CRISPR. This paper (to  
92 our knowledge the initial attempt to analyze CRISPR in this way) will utilize two promising  
93 analytical frameworks- the first is usually called main path (or knowledge trajectory) analysis and  
94 the second is called rate of improvement estimation.

95 Main path analysis began with Hummon and Doreian’s technique for analysis of citation  
96 networks of scientific papers and their initial application was to the development of DNA theory  
97 from 1820 to 1965 (12). They developed the methodology and demonstrated it by identifying the  
98 key papers in this knowledge trajectory. Verspagen (13) and Mina et al (14) then adapted main  
99 path analysis for technological knowledge trajectories by applying the Hummon and Doreian  
100 technique to the patent citation network for fuel cells (13) and coronary artery disease treatment  
101 (14). The technique has been extended (15) and applied to several other technological domains  
102 (16, 17) including telecommunication switching, solar photovoltaics, desalination and others. A  
103 technique for obtaining relevant and relatively complete patent sets for characterizing domains  
104 developed by Benson and Magee (18, 19) proved useful in main path analysis (17) and is the  
105 starting point for gathering patents in the present work.

106 Empirical study of the change in technological performance with time (20-30) has shown that  
107 the exponential dependence first noted by Gordon Moore (20) applies (with ample noise) to all  
108 domains studied. It is also clear that the exponent (or % change per year) varies among  
109 technological domains from ~1.5% per year to ~65% per year (28, 30). Obtaining empirical  
110 estimates for any given domain is problematic and at best extremely time consuming but recent  
111 work (31-34) has resulted in reliable estimates based upon representative sets of patents for the  
112 domain of interest. Indeed, Triulzi et al (33) have shown that the most reliable estimate of  
113 performance improvement rate is based upon analysis of the same patent citation network used  
114 to determine knowledge trajectories. Domains that improve more rapidly carry more than their  
115 share of the total information flow on the overall patent citation network; that is, their patents  
116 have higher average information centrality.

117 The extremely high interest in and potential for CRISPR along with the patent analysis  
118 methods just mentioned led to the formulation of two research objectives guiding the current  
119 research. The first research objective involves determining what the patent record shows about

120 the relationship of CRISPR to prior technology- particularly pre-existing genome engineering  
121 technology. The second research objective is to estimate the rate of improvement in  
122 performance of genome engineering and CRISPR.

### 123 Collection of data

#### 124 Genome engineering patent set

125 The current research utilizes two sets of US patents for the quantitative empirical study.  
126 The first set of patents represent the genome engineering domain and are retrieved using the  
127 Classification Overlap Method (COM) (18,19) which utilizes two different classification systems  
128 to obtain highly relevant patents. In this study, the COM procedure was implemented in 5 steps.  
129 (step 1) Preparation of Pre-set patents: This step can utilize representative key inventors,  
130 assignees, or patents. In the current study, we utilized 58 key patents found by searching for  
131 some known inventors of genome editing technologies. (step 2) Identification of classes in two  
132 distinct classification systems: we chose the US Patent Classification (UPC), and the Cooperative  
133 Patent Classification (CPC) as the systems. Mean Precision-Recall (18, 19) was used as a metric to  
134 identify the relevant classes in UPC and in CPC. (step 3) Patents that are common to classes in  
135 UPC and in CPC identified in Step 2 are retrieved; (step 4) Test of relevancy: A sample of retrieved  
136 patents (most cited 100 patents and 200 randomly selected patents from the remaining) were  
137 read (mostly just titles and abstracts) by the investigators to determine relevancy of the patent  
138 set. (step 5) For completeness, the classes were checked to ensure that more than 75% of the 58  
139 key patents were included in the retrieved set of patents.

140 To generate the final genome engineering patent set, the steps above were applied to all  
141 granted US patents from 1970/01/01 to 2018/01/15 available in Patsnap, a commercial patent  
142 database (35). The 58 key patents for Step 1 were identified by a domain expert through  
143 literature review of patents found by searching for known major participants in genome editing  
144 technologies. The 58 patents uncovered include 28 patents related to zinc finger nuclease (ZFN),  
145 8 patents for transcription activator-like nucleases (TALEN), 6 patents for meganuclease and 16  
146 patents for CRISPR. An in-depth study of a sample of patents in the genome editing patents  
147 showed that significant number of the patents were classified in many classes. For example,  
148 patent number US8865406 is classified into 14 UPC classes, which is unlike what is typically seen  
149 in other technological domains such as Solar Power, Batteries, and Integrated Circuits (average  
150 is 3.2 UPC classes). Further, we also observed that the Mean-Precision Recall value of UPC and  
151 CPC classes decayed slowly as compared to other domains. This implied that potentially relevant  
152 patents were widely dispersed across many classes both in UPC and in CPC. This made it  
153 necessary to include multiple classes both in UPC and in CPC to attain adequate coverage of  
154 patents and dictated that reading titles and abstracts was done in multiple iterations.

155  
156 Fig. 1. Application of Classification of Overlap Method (COM). (A) UPC and CPC classes and time period used  
157 to implement COM; (B) Description of UPC and CPC classes; (C) Visual depiction of the 58 patents in the pre-set in  
158 the classes selected, an indication of completeness. White spaces indicate the patents not retrieved in this set; (D)  
159 Total patents retrieved and percentage of 58 key patents covered by the Pre-CRISPR patents.

160  
161  
162 Fig. 1 shows the classes considered to retrieve genome engineering patents, which are  
163 decomposed into three components for readability: The first component consists of patents

164 related to ZFN, TALEN, and meganuclease. As shown in Figure 1, this component uses four classes  
165 from UPC and four from CPC. The second and third components consist of patents related to  
166 CRISPR, and uses a Ribonuclease class both in UPC and in CPC. We note here that COM utilizes  
167 two classification systems to identify patents in a domain, as the co-occurrence in two classes in  
168 different systems leads to highly relevant patents (18, 19). Since mid-2015, the USPTO has  
169 stopped classifying US patents using UPC classes. Therefore, we split the period into prior to mid-  
170 2015, and after mid-2015, so we may still gain the advantage of COM's effectiveness in yielding  
171 highly relevant set of patents for the period before mid-2015. The third component utilizes only  
172 the CPC class. Using the classes and the time period considered (1970/1/1-2018/1/15), we  
173 retrieved 1373 patents. Hereafter, this group of patents is referred to as the *genome engineering*  
174 *patent set*. The set covers 78% of 58 patents in the Pre-set patents. Out of 28 Zn finger patents,  
175 18 were recovered; for Talen 6 out of 8; for Meganuclease 5 out of 6; and for CRISPR 16 out of  
176 16 (See Fig 1C).

177 Patenting activity for genome engineering occurred at a steady pace from 1999 until 2012  
178 with about 40-60 patents granted per year (see Figure 2A). The patenting activity, however,  
179 greatly accelerated recently, doubling to about 115-120 patents for 2016 and 2017 with the  
180 accelerated pace due to pursuit of CRISPR technology. Figure 2B shows the top 10 assignees for  
181 the genome engineering patent set.

182 Fig 2. Patenting activity for genome engineering patent set. (A) patents granted yearly 1999-2017; (B) Top 10  
183 assignees (with formal names) New England Biolabs, Sangamo Biosciences, Harvard University (President and  
184 Fellows of Harvard College), University of California (The Regents of The University of California), WARF (Wisconsin  
185 Alumni Research Foundation), MIT (Massachusetts Institute of Technology), Stanford University (The Board of  
186 Trustees of The Leland Stanford Junior University), Boehringer Mannheim (Boehringer  
187

## 188 CRISPR Roots Patent Set

189 This study also undertook a direct generational study of the citation network emanating  
190 from the CRISPR patents. The creation of a new CPC patent class by the USPTO during 2017 -  
191 specifically to contain CRISPR patents- defined a useful starting point to find current CRISPR  
192 patents. As of January 14, 2018, this CPC patent class (C12N2310/20) contained 37 patents  
193 (granted between 1976/1/1 – 2018/1/15) which we call Generation 0 (in short Gen0 patents).  
194 We then retrieved the 112 granted patents cited by Gen0 patents (generation 1, in short Gen1).  
195 These 112 patents are those remaining after those cited that were already in Gen0 were  
196 removed, thus making Gen1 mutually exclusive. We then retrieved 1230 patents cited by Gen1  
197 patents, but not belonging to Gen0 or Gen1, as Generation2 (in short, Gen2) patents. It is noted  
198 that there was no restriction as to what classes the cited patents in Gen1 and Gen2 belonged.  
199 These three subsets, Gen0, Gen1 and Gen2, in total 1379 patents, make up the patent network  
200 directly generated by citation cascade from CRISPR patents in 2 generations of citations. We  
201 designate this set of patents the CRISPR roots patent set and will use this terminology hereafter.  
202 Figure 3 shows descriptive information about the time dependence and ownership of this patent  
203 set.

204 Fig 3. Patenting activity for CRIPSPR Roots set. (A) Patents granted yearly 1976-2017; (B) Top 10 assignees  
205 (with formal names): Univ of California (The Regents of The University of California), MIT (Massachusetts Institute  
206 of Technology), Isis Pharmaceuticals, Sangamo Biosciences, Life Technologies, Alza (Alza Corporation), Harvard Univ

207 (President and Fellows of Harvard College), Broad Institute (The Broad Institute, Unger, Evan (Evan C. Unger), Caltech  
208 (California Institute of Technology).  
209

210 Fig. 3A shows yearly patents granted from 1976 until 2017 for the CRISPR roots. Most of  
211 patents in the set were granted from the late 1980's to the early 2000's. This distribution over  
212 time is not surprising: about 89% of the patents in the set belong to Gen2 which represent the  
213 relatively older citations from Gen1. Fig 3B shows the top 10 assignees in the CRISPR roots.

#### 214 Main path Methodology

215 The main path methodology provides the means to identify important patents in the  
216 technological domain and pathways through which the technological knowledge diffused in the  
217 domain. The method originated to understand the evolution of scientific fields through study of  
218 citations by scientific publications (12). The methodology was adapted and modified to  
219 investigate the evolution of knowledge in many technological domains (13-17). Most recently,  
220 the method has been optimized to produce simpler main paths, while capturing a greater number  
221 of important patents (17). Labeled as genetic backward-forward path (GBFP) analysis, the  
222 optimized method consists of four steps shown in Figure 4: assembling/collecting a patent set,  
223 constructing a citation network within the patent set, measuring knowledge persistence of the  
224 patents to identify genetically high-persistent patents, and tracing main paths (forward and  
225 backward) from the genetically high-persistent patents.

226 To implement the method for the genome engineering and CRISPR roots patent sets, the  
227 patent network is constructed using the citations made by the patents in the sets. It is noted that  
228 we consider citations only within the patent set; any citations outside the patent set are ignored.  
229 To estimate the persistence of knowledge (15,17) contained in each patent, the patent network  
230 is first ordered using the citations into  $n$  layers (visualize that the patents initially cited are on the  
231 left) and then knowledge persistence is estimated for each patent in the leftmost layer (layer 1).  
232 The process is repeated successively for the subsequent layers moving to the right (layers 2, 3,  
233 4...) after eliminating all the layers to the left of the layer in question. This algorithm estimates  
234 two types of persistence values (0 to 1 after normalizing) for each patent in the network: global  
235 persistence (GP) and local persistence (LP). The GP of a patent is estimated to gauge the  
236 importance of a patent in the entire network whereas LP is estimated to gauge the importance  
237 of patents in each layer. The layer persistence plays a significant role in identifying and retaining  
238 important patents, which are recent, and hence, have not had a chance for their lineage to  
239 evolve. The high-persistent (GP > 0.3 and LP > 0.8) patents then become the origin for tracing for  
240 the main paths, both backward and forward (17). We adopt GBFP analysis to investigate the  
241 evolution of CRISPR within the genome engineering domain. Specifically, we use this  
242 methodology to identify important patents in genome engineering which preceded the CRISPR  
243 technology. By reading these important patents we are also able to identify technology clusters  
244 within genome engineering that preceded CRISPR.

245

246 Fig. 4 Steps for genetic backward-forward path analysis (GBFP) adapted from (17)

247

248 Estimation of patent centrality and annual improvement rate (k)

249 The estimation of annual improvement rate for a set of patents starts- as does the main  
250 path method just described- with the patent citation network. The centrality of a patent is  
251 analogous to betweenness centrality in network analysis, and provides a measure of the  
252 influence a node, in our case the patent, has over flow of information (in our case, the  
253 technological knowledge) through the network. Our calculation of the information centrality can  
254 again be traced to Hummon and Doreian (12) and their introduction of search path node pairs  
255 (SPNP) as a metric to compute the centrality of a focal paper in a scientific paper citation network.  
256 The SPNP for a focal patent (say, patent B) in a patent citation network calculates the number of  
257 pathways originating from one patent (say, patent A) to another one (patent C) in the network  
258 *and* passing through the focal patent (patent B). The higher the number of pathways traversing  
259 through the focal patent the higher the centrality of the focal patent, indicating the importance  
260 of the focal patent in the patent citation network. Since each patent can be interpreted as  
261 containing some original technological knowledge, the centrality provides a sense of the  
262 importance of the original knowledge introduced by the focal patent for the downstream  
263 patents. Triulzi et al (33) normalized the SPNP to account for the variations inherent in the  
264 patenting system (for example, citation practices between fields, and particularly over time),  
265 which make raw centrality values of patents across domains and between two different time  
266 periods non-comparable. To control for these variations, the computed centrality of a patent is  
267 compared with the expected value of the centrality of the same patent in appropriately  
268 randomized models of the citation network (33). The centrality calculated was for the citation  
269 network of all US utility patents granted from 1976 until 2015. Triulzi et al further find that the  
270 mean normalized centrality of a patent set representing a specific technological domain is a  
271 reliable predictor of its annual rate of improvement (k). They arrive at this conclusion by a Monte  
272 Carlo cross-validation exercise between empirically observed k for the 30 diverse technological  
273 domains (28, 30) and their corresponding mean normalized centrality of the patent sets for the  
274 same 30 technological domains. Their regression model developed considering 30 technological  
275 domains is shown below:

276 
$$k_i = (e^{-5.01885 + 6.15987 * C_i}) * e^{\frac{\sigma_i^2}{2}}$$

277 Where  $k_i$  represents the annual rate of improvement for domain  $i$ ,  $C_i$  the mean normalized  
278 centrality of the patent sets for the domain  $i$ , and  $\sigma_i$  the standard deviation of  $C_i$ . We have  
279 adopted their regression model to estimate the annual rate of improvement for the genome  
280 engineering and CRISPR roots patent sets. Indeed, we used the centrality calculations developed  
281 by Triulzi et al (33) for the patents in our patent sets to calculate the mean for the two sets which  
282 we treated as domains.

283

## 284 Results

### 285 Genome engineering main path

286 Figure 5 gives the results of applying the main path methods described in the previous  
287 section to the genome engineering patent set. The main path is a network with three principal  
288 components (GE1, 2 and 3). While all relate to the development of enzymes to bind and cleave  
289 DNA, GE1 and GE3 relate to the production of restriction endonucleases (REs) for general  
290 molecular biology applications whereas the larger GE2 path relates specifically to core genome  
291 editing development.

292 GE3 has the oldest patents dating to the mid-1970's. The initial patents (1, 2 and  
293 3), all assigned to Rikagaku, Japan, specify methods for purifying endogenous nucleases from  
294 bacterial cells. Subsequent patents in this path from the 80's and the early 90's relate to methods  
295 of producing specific REs.

296 Patent 13 (US5200333) belongs to GE1 and it also initiates GE2. This patent relates to  
297 improvements in methods of producing REs by selection of bacterial cells expressing methylase  
298 enzymes that confer resistance to the RE produced. The GE1 path extends this with further  
299 enhancements to the methodology of producing REs (patents 29, 30, 31,32) and applying these  
300 improvements for producing specific REs (patents 33 and 34). Most of the patents in GE1 are  
301 assigned to New England Biolabs indicating a significant role for them during the 1990's  
302 improving the methods of RE production.

303  
304  
305  
306

307 Fig. 5 Main path results for genome engineering patent set. Three main paths (GE1, GE2 and GE3) have been  
308 identified. GE1: Cloning and restriction endonuclease (REs); GE2: core genome editing; GE3: Endonuclease and  
309 related enzymes. Labeled nodes represent patents and are identified in the side table with the patent number  
310 which allows one to search for and read the patent on various databases.

311  
312 GE2 is the path of direct relevance to genome engineering. Based on the same  
313 improvements on RE production described in patent 13, GE2 combines these with major  
314 advances in creating synthetic novel REs that recognize rarer DNA targets using ZFNs and TALENs  
315 and ultimately CRISPR complexes that are applicable to genome engineering. This path is  
316 analyzed further in Figure 6 showing the key patents in the development of genome engineering  
317 that underlie the emergence of CRISPR.

318  
319  
320 Fig. 6 Technology clusters in GE2 main path. The patents in GE2 are identified in clusters of different technologies  
321 shown in the table in the upper left of the figure: (A) restriction endonuclease (RE) production technology; (B)  
322 separation of RE and DNA binding domains; (C) hybrid REs and genome engineering; (D) Zinc-finger nuclease (ZFN);  
323 (E) Therapeutic application of ZFN, TALEN, or CRISPR; (F) Transcription activator-like effector nuclease (TALEN); (G)  
324 Extending genome engineering to RNA level regulation. Nodes represent patents repeated from Figure 5 and the  
325 actual patent numbers are identified in the lower left legend in this figure.

326 Patents 9 and 11 (labeled cluster B in figure 6) from the early 90's describe a fundamental  
327 step forward, taken by Chandrasegaran's group at Johns Hopkins University, towards the goal of



328 genome engineering: The separation of FokI restriction endonuclease (RE) into two distinct  
329 domains, one that binds its cognate target DNA sequence and the other containing the nuclease  
330 activity that cleaves DNA. This invention led to the possibility that the nuclease activity of FokI  
331 could be fused to alternative DNA binding domains to create so called “hybrid REs” with novel,  
332 and potentially rare DNA target sequences useful for genome engineering in large animal and  
333 plant genomes (36).

334 A significant challenge in producing hybrid REs in bacteria was that they were potentially  
335 lethal to their host bacteria if the latter contained target sequences in their genome (36). Patents  
336 12 and 14 from the mid-90’s describe improvements to bacterial hybrid RE synthesis by co-  
337 expressing DNA ligases and/or expressing the hybrid REs on inducible plasmids to mitigate this  
338 risk. Patent 15 describes the use of these methods to produce hybrid REs for genome editing as  
339 well as other proteins that bind specific target DNA sequences for other applications. Patents 12,  
340 14 and 15 are thus labeled as a cluster (C in the figure) which we refer to as Hybrid REs.

341 Another key step forward was the elucidation of the structure of zinc finger transcription  
342 factors revealing their modular zinc finger (ZF) structures responsible for DNA sequence  
343 specificity. This led to the idea that ZFs could be fused to a nuclease to create a hybrid RE with a  
344 novel DNA sequence specificity (36, 38, 39). In the late 90’s and early 00’s, patents 10 and 16  
345 from Sangamo Biosciences describe the foundational invention of hybrid REs that fuse zinc finger  
346 DNA-binding domains with the FokI nuclease domain to create a zinc-finger nuclease (ZFN)  
347 capable of regulating or inactivating a target gene in its normal chromosomal context. These two  
348 patents and patent 17 constitute the ZFN labeled cluster D in figure 6.

349 The later discovery of transcription activator-like effectors (TALE) bacterial proteins that  
350 could, like zinc fingers, be engineered to create novel DNA binding specificities led to an  
351 analogous approach of fusing TALE binding domains to nucleases (36,38,39). Patents 21 and 26  
352 from the Bonas group at Halle-Wittenberg University and Sangamo Biosciences respectively  
353 fused TALE domains to FokI nuclease to create TALE nucleases (TALENs) for genome engineering.  
354 More recent improvements in TALEN technologies by Sangamo are described in patents 22 and  
355 23. Patents 21, 22, 23 and 26 are thereby designated cluster F-TALENs.

356 In the late 1990’s, the discovery that the FokI nuclease is comprised of two monomers  
357 that require dimerization for nuclease activity led to the invention (Patent 17) of ZFN pairs  
358 comprising two monomers, each with a FokI half-cleavage domain and a zinc finger domain. ZFN  
359 pairs provided greater DNA target specificity because they require correct binding of two  
360 separate zinc fingers to reconstitute the nuclease activity of the FokI dimer (36).

361 In the past decade, patents 18, 19 and 20 describe the application of ZFN and TALEN  
362 genome engineering technologies for specific therapeutic purposes, such as to modulate PD1  
363 gene expression for cancer immunotherapy (patent 18) or severe combined immunodeficiency  
364 (SCID) related genes (patents 19 and 20). Patents 24, 25, 27 and 28 from Factor Bioscience all  
365 describe extending the therapeutic application of ZFN, TALENs or CRISPR by therapeutic delivery  
366 of a synthetic RNA encoding the genome editing enzymes rather than DNA. In this way, the  
367 therapeutic nucleic acid is not incorporated into the genome potentially reducing the risk of  
368 unwarranted mutagenesis and limiting the therapeutic exposure to the lifespan of the RNA  
369 molecule.

370 The 20 patents just discussed and particularly the 12 (see Figure 6) that the technique  
371 identified as high persistence patents are clearly important patents as identified by other

372 observers. The main path technique indicates that they are the most important in the overall  
373 development of genome editing prior to CRISPR. Therefore, we regard this small set of patents  
374 as the core technology preceding the CRISPR breakthrough but we do not regard all the rest of  
375 the 1373 patents in the set as unimportant since it is highly likely there are other quite important  
376 patents in the set.

377

#### 378 CRISPR Roots Patents

379 The CRISPR roots patent set is different from the genome engineering patent set as it  
380 does not focus on a specific technical area (genome engineering) but instead backwardly traces  
381 *all* patented knowledge sources that have contributed to the emergence of CRISPR technology.  
382 Recall that the genome engineering patent set was carefully limited to chosen patent classes  
383 whereas the CRISPR roots set was subject to no such constraint. Additionally, all citations outside  
384 this selected set were ignored for the genome engineering main path analysis whereas the  
385 CRISPR roots includes *all* citations from the initial set of patents. The well-known and important  
386 phenomenon known as spillover means that the roots patent set will reflect broad sources of  
387 knowledge not included in the genome engineering domain.

388 The difference in breadth between the CRISPR roots and the genome engineering patent  
389 set is visible in the main path derived from the roots patent set. Figure 7 shows the result from  
390 application of the main path method to that patent set. Since this patent set is obtained starting  
391 with the citations by the currently published CRISPR patents, this knowledge network is  
392 constrained to end on the right at the CRISPR patents and the main path identifies patents that  
393 were particularly important in citations cascading back from these patents. The reasoning to  
394 develop this non-usual main path was simply to reduce the 1300+ patent set to the 50 most  
395 important ones so that it was possible to read and sort the patents.

396

397 Figure 7. Main Path for the CRISPR roots showing patents on this knowledge trajectory from the CRISPR patents  
398 (gen 0), the patents cited by the CRISPR patents (gen 1) and the patents cited by gen 1 patents but not by CRISPR  
399 patents (gen 2). Three main paths (CR1, CR2, and CR3) have been identified. CR1: Technologies for introducing  
400 nucleic acid into mammalian cells; CR2: Genome engineering (including protein binding domains, ZFN and CRISPR);  
401 CR3: DNA finger printing and PCR. Labeled nodes represent patents shown in the table below the main path  
402 diagram. The node numbers increase along the time axis.

403

404 Like Figure 5, the main path network in Figure 7 also can be interpreted as consisting of  
405 three knowledge trajectories. At the top of the diagram is a large sequence of patents (CR1) that  
406 are concerned with delivery or the introduction of nucleic acid to mammalian cells. In the bottom  
407 part of Figure 7 are a set of patents (CR3) that involve DNA fingerprinting and demonstrate the  
408 pervasive impact of PCR on biotechnology as it emerges in the CRISPR context. The central main  
409 path or knowledge trajectory is genome engineering (CR2) which is connected to CR3 in 3 places  
410 and to CR1 in the link between patents 34 and 40. The presence of CR1 and CR3 paths in the roots  
411 main path demonstrates the broader scope of the CRISPR roots compared with the genome  
412 editing patent set. The patents in these paths were not in the genome engineering set by design  
413 but are shown in Figure 7 to play a prominent “spillover” role in the emergence of CRISPR.

414

415 Table 1 shows the ten patents with the highest normalized centrality (maximum = 1) from  
416 the CRISPR roots. Demonstrating the relative breadth in the CRISPR nucleus compared to the  
genome engineering patent set is the fact that *none* of these patents are in the genome  
engineering set. Instead, they include very important patents from the osmotic device domain,

417 the ultrasound apparatus domain, nucleic acid methodology, crystal protein technology, and the  
418 drug delivery domain. With a minimum normalized centrality of  $> 0.986$ , these patents are highly  
419 important in their own domain and likely represent indirect or spillover technology essential to  
420 the development of CRISPR but are not on the genome engineering main path. Indeed, the  
421 second ranked patent in Table 1 is the very important/central PCR patent by Kary Mullis. It is  
422 probable that without PCR, there would be no CRISPR but this does not signify that this patent is  
423 on the main knowledge accumulation path leading to CRISPR. This result is similar to the broad  
424 scientific input that enabled CRISPR identified by Lander (9), by Doudna and Sternberg (10) and  
425 by Urnov (11) but the patents in Table 1 represent technological breadth not usually identified.  
426

427 Table 1: The ten top-ranked patents from the CRISPR nucleus according to information  
 428 centrality.  
 429

| Publication Number | Title                                                                                      | Publication Year | Standardized Inventor                                 | Standardized Assignee           | Centrality |
|--------------------|--------------------------------------------------------------------------------------------|------------------|-------------------------------------------------------|---------------------------------|------------|
| US4210139          | Osmotic device with compartment for governing concentration of agent dispensed from device | 1980             | Higuchi Takeru                                        | Alza Corp                       | 0.999883   |
| US4683202          | Process for amplifying nucleic acid sequences                                              | 1987             | Mullis Kary B                                         | Cetus Corp                      | 0.998493   |
| US4327725          | Osmotic device with hydrogel driving member                                                | 1982             | Cortese Richard   Theeuwes Felix                      | Alza Corp                       | 0.996192   |
| US4620546          | Ultrasound hyperthermia apparatus                                                          | 1986             | Aida Satoshi   Matsumoto Kenzo   Itoh Ayao   ...      | Toshiba                         | 0.993626   |
| US4959217          | Delayed/sustained release of macromolecules                                                | 1990             | Sanders Lynda M   Domb Abraham                        | Syntex Corp                     | 0.992252   |
| US5270163          | Methods for identifying nucleic acid ligands                                               | 1993             | Gold Larry   Tuerk Craig                              | Univ Research Corp, Boulder, CO | 0.988969   |
| US4900540          | Liposomes containing gas for ultrasound detection                                          | 1990             | Ryan Patrick J   Davis Michael A   Melchior Donald L  | Univ Of Massachusetts           | 0.987955   |
| US5380831          | Synthetic insecticidal crystal protein gene                                                | 1995             | Adang Michael J   Rocheleau Thomas A   Merlo Donald J | Mycogen Plant Science, Inc      | 0.987837   |
| US4448885          | Bacillus thuringiensis crystal protein in Escherichia coli                                 | 1984             | Schnepf H Ernest   Whiteley Helen R                   | University Of Washington        | 0.987605   |
| US5078994          | Microgel drug delivery system                                                              | 1992             | Nair Mridula   Tan Julia S                            | Eastman Kodak                   | 0.986634   |

430  
 431  
 432 Although, as just emphasized, there are differences in the collection techniques and  
 433 therefore in the results shown in Figures 5/6 and 7, there are also important similarities since  
 434 both reflect the genome engineering work that preceded CRISPR. In this regard, we note that 5  
 435 of the top institutional owners of patents in the genome editing set are also in the top  
 436 institutional owners of patents in the CRISPR roots set (compare Figure 2B and Figure 3B).  
 437 Moreover, Table 2 shows 8 key patents in the main path of the genome engineering set that are  
 438 also in CRISPR roots set. All 8 patents listed in Table 2 that are found in the CRISPR nucleus are  
 439 also found in the GE2 (core genome editing) knowledge trajectory from the main path analysis  
 440 of that domain. The node numbers in Table 2 are the ones given to these patents in Figure 6  
 441 which shows GE2 details and clusters. These 8 patents all relate to the foundational inventions  
 442 of genome engineering prior to the discovery of CRISPR. As described above, patents 9 and 11  
 443 are inventions based on the discovery that the FokI restriction endonuclease is made of two  
 444 separable DNA binding and cleavage domains. Patents 12, 14 and 15 describe methodological

445 improvements in producing hybrid REs, while 10, 16 and 17 are related to the development of  
 446 ZFNs as the first generally applicable hybrid REs for gene editing. The overlap between the  
 447 patent sets is further illustration of the importance of earlier genome engineering technology to  
 448 the development of CRISPR genome engineering despite the independent discovery of the  
 449 original bacterial CRISPR viral resistance mechanism and all the very important but more distant  
 450 knowledge represented in Table 1.

451  
 452 Table 2: Eight key patents in the main path and core of genome editing which are also in the  
 453 CRISPR roots set.

| Publication Number | Gen  | Node # | Cluster                                             | Title                                                                                         | Publication Date | Inventor                                                                    | Assignee                 |
|--------------------|------|--------|-----------------------------------------------------|-----------------------------------------------------------------------------------------------|------------------|-----------------------------------------------------------------------------|--------------------------|
| US5356802          | gen1 | 9      | (B) Separation of RE nuclease & DNA binding domains | Functional domains in flavobacterium okeanokoites (FokI) restriction endonuclease             | 1994-10-18       | Chandrasegaran Srinivasan                                                   | Johns Hopkins University |
| US5436150          | gen1 | 11     | (B) Separation of RE nuclease & DNA binding domains | Functional domains in flavobacterium okeanokoities (foki) restriction endonuclease            | 1995-07-25       | Chandrasegaran Srinivasan                                                   | Johns Hopkins University |
| US5792640          | gen2 | 14     | (C) Hybrid Res & genome engineering                 | General method to clone hybrid restriction endonucleases using lig gene                       | 1998-08-11       | Chandrasegaran Srinivasan                                                   | Johns Hopkins University |
| US5916794          | gen2 | 12     | (C) Hybrid Res & genome engineering                 | Methods for inactivating target DNA and for detecting conformational change in a nucleic acid | 1999-06-29       | Chandrasegaran Srinivasan                                                   | Johns Hopkins University |
| US6265196          | gen2 | 15     | (C) Hybrid Res & genome engineering                 | Methods for inactivating target DNA and for detecting conformational change in a nucleic acid | 2001-07-24       | Chandrasegaran Srinivasan                                                   | Johns Hopkins University |
| US6534261          | gen1 | 10     | (D) Zinc-finger nuclease (ZFN)                      | Regulation of endogenous gene expression in cells using zinc finger proteins                  | 2003-03-18       | Cox Iii George Norbert   Case Casey Christopher   Eisenberg Stephen P   ... | Sangamo Biosciences      |
| US7163824          | gen1 | 16     | (D) Zinc-finger nuclease (ZFN)                      | Regulation of endogenous gene expression in cells using zinc finger proteins                  | 2007-01-16       | Cox Iii George Norbert   Case Casey Christopher   Eisenberg Stephen P ...   | Sangamo Biosciences      |
| US8034598          | gen1 | 17     | (D) Zinc-finger nuclease (ZFN)                      | Engineered cleavage half-domains                                                              | 2011-10-11       | Miller Jeffrey C                                                            | Sangamo Biosciences      |

454  
 455

456 Performance Improvement results

457 Table 3 gives the results obtained when applying the k estimation algorithm described in  
458 the methods section (k is directly determined from the average centrality of the patent set) to  
459 the two patent sets. The first result is that the patent sets give different estimates of k  
460 (approximately x3 difference). Perhaps more significantly, both estimates are relatively low. We  
461 now briefly consider these two findings.

462

463 Table 3: The estimated annual improvement (k) in percentage for the genome engineering  
464 patent set (domain) and the CRISPR roots set.

465

| Patent Set (1970/01/01 – 2018/01/15) | k (Annual Improvement Rate %) |
|--------------------------------------|-------------------------------|
| Genome engineering patent set        | 3.6%                          |
| CRISPR Roots patent set              | 9.5%                          |

466

467 Prior analysis of uncertainty in the k estimates (33, 34) indicates that +/- 50% uncertainty  
468 is a reasonable quantification for k +/-  $\sigma$ . This uncertainty in the estimate is consistent with  
469 empirical measurement of k (28, 29). Thus, the x3 difference in the estimated k values is probably  
470 not only due to uncertain estimates. Since these two sets of patents have large differences in  
471 what is included, significant differences in k are not unreasonable and could arise in various ways.  
472 One factor that appears likely to explain a large part of the differential result is the significantly  
473 larger breadth of the patents in the CRISPR roots which was discussed in the preceding section  
474 as reflecting the “spillover” patents in the roots that are not in the genome editing patent set.  
475 Such patents were not included in the domains where the empirical correlation was established  
476 (31,33) and would tend to distort k estimates for domains upwardly since patents cited from  
477 “farther afield” tend to be patents that are important in carrying information-that is have  
478 important new knowledge at their core- and thus have higher centrality than average. Since the  
479 genome engineering patent set has considerably lower average centrality (0.27) than the entire  
480 US patent set (0.5), including such patents in the set (as the roots set does) raises the overall k  
481 estimate. For example, the patents in Table 1 are the highest centrality patents from the roots  
482 set and were already seen as demonstrating breadth in the roots patent set.

483 Our second finding is that even the k value for the roots set is not very high in terms of  
484 what we now know about k values in various domains. Indeed, the average centrality of the  
485 genome engineering set is well below average (0.27) for USPTO patents and the average  
486 centrality of the CRISPR roots is higher (.43) but still below average for the entire US patent set  
487 which is equal to 0.5 (33).

488 Discussion and Conclusions

489 Our first research objective was to determine what the patent record suggests relative to  
490 the relationship of CRISPR to prior technology- particularly pre-existing genome engineering. The  
491 results presented here (particularly Figure 6 and Table 3) show clearly that pre-existing genome  
492 engineering technology was essential to the emergence of CRISPR. There is close alignment of

493 the qualitative history and the objective knowledge trajectory determination for the genome  
494 engineering patent set as shown by qualitatively known important patents being on the main  
495 path. Such agreement is what one would expect if the main path methodology and the patent  
496 selection methodology work as has been claimed previously (11, 12, 16,17,18). The present  
497 results thus offer some additional support to these prior claims.

498 The results in this paper go beyond confirming the expected importance of key earlier  
499 genome engineering developments on the emergence of CRISPR by demonstrating the quite  
500 broad array of technologies found in the CRISPR roots set (Table 1 and figure 7). The technologies  
501 playing an important and possibly essential role in CRISPR emergence include knowledge about  
502 PCR, knowledge from the osmotic device domain, from the ultrasound apparatus domain, from  
503 the crystal protein technology domain, and the drug delivery domain among many others. Such  
504 breadth is not unexpected from the prior knowledge of spillover but the specifics of the breadth  
505 is not usually determined. We note that qualitative histories tend to focus on the most direct  
506 technological path (or just the science) and thus do not begin to point to the technological  
507 breadth that may be essential to the emergence of highly novel and important technologies like  
508 CRISPR.

509 The results obtained in pursuit of our second objective (estimation of the rate of  
510 improvement for CRISPR) go well beyond anything done elsewhere. The estimate of the rate of  
511 technological performance improvement for CRISPR has been reported here and is the only  
512 estimate for *any* emerging technological domain to our knowledge. Since it is a first estimate of  
513 its kind, we must be careful to not over-claim significance and thus the following discussion  
514 should be considered preliminary until further patents emerge over time in the CRISPR domain  
515 and more importantly until other newly emerging technologies are studied by the techniques  
516 pioneered here. Although there has been some work on some emerging (but poorly defined)  
517 domains such as nanotechnology, this has not used the methods (main paths, roots investigation,  
518 rate estimation) applied herein to CRISPR. Most importantly, such domains typically have patents  
519 dating from many years back whereas the first CRISPR patent was in 2012. Studies of other  
520 emerging domains that we envision would concentrate on the initial 5-10 years after the initial  
521 patent.

522 Regarding the relatively low rate of performance improvement estimated for CRISPR,  
523 there are two topics worthy of such an early discussion. One is the potential importance of this  
524 observation to the evolving CRISPR story and another one is possible specific kind of performance  
525 improvement that is being estimated. As an initial remark on the significance of the observation  
526 in the evolving CRISPR story we do not believe low performance improvement rates mean that  
527 CRISPR is less important than it has been declared to be (1-10). However, we find it probable  
528 that the performance improvement being estimated is important rather than something to be  
529 ignored. One speculation is that the rate of improvement may relate to an unimportant metric;  
530 however, logical analysis of known results make this appear unlikely. It is unlikely first because it  
531 is usual (28) that *most intensive improvement rates in a domain are the same* within the normal  
532 variation so important and less important metrics tend to improve at the same rate. Moreover,  
533 some logical metrics for such a domain are clearly important; for example, a metric such as the  
534 increase in benefit (for example quality life years in a case like CRISPR) divided by the constraint  
535 (for example cost) is a likely relevant intensive metric that is improving at 3.5% (or possibly 9%)  
536 per year. To improve such a metric as Quality/\$ for CRISPR therapies from a very low starting point

537 today will take solving multiple problems of harmful side effects while improving the ease with  
538 which genome engineering can be applied to a variety of human diseases. Thus (remembering  
539 our caveat about conclusions being preliminary), it is likely that important CRISPR based therapies  
540 will be appearing over many decades –not just in the next few years and that important  
541 developments in genome engineering will continue to build on and beyond CRISPR.

542 Our last conclusion from the research reported here is that the techniques used in the  
543 paper (main paths, comparing roots and the specific technological domain, k estimation) allow  
544 one to further understand specific technological developments very early after their emergence.  
545 However, we would like to stress that such objective methods are not a replacement for deep  
546 qualitative studies such as those by Lander, Doudna/Sternberg and Urnov (9,10,11) but instead  
547 are a valuable supplement. The supplement in this case is the clear *technological* breadth of  
548 CRISPR, the core gene editing patents linked to CRISPR, and the indication –even though  
549 preliminary- of relatively slow performance improvement of CRISPR.

## 550 Acknowledgements

551 The authors gratefully acknowledge research support from Merck KGaA, Darmstadt,  
552 Germany and the help of Erik Vogan of MIT's Industrial Liaison Office in initiating this research  
553 effort. The observations, description and opinions expressed here are those of the authors  
554 alone. We were in no way influenced by the granting organization or any other institution.

555 We also are grateful to Professor Giorgio Triulzi of the University of Los Andes (Columbia)  
556 for the centrality values for patents in both patent sets, to Professor Hyunseok Park of Hanyang  
557 university for the persistence main path software, and to Ritu Raj Lamsai of Deerwalk Institute  
558 for valuable inputs on patent searches and reading of patents.

559

## 560 References

- 561 1. For examples, see <https://labiotech.eu/crispr-review-patent-war/> or  
562 <http://www.21stcentech.com/power-control-evolution-human-hands/> accessed on  
563 3/27/18
- 564 2. For example, see [https://www.nationalgeographic.com/magazine/2016/08/dna-crispr-](https://www.nationalgeographic.com/magazine/2016/08/dna-crispr-gene-editing-science-ethics/)  
565 [gene-editing-science-ethics/](https://www.nationalgeographic.com/magazine/2016/08/dna-crispr-gene-editing-science-ethics/) accessed on 3/27/18
- 566 3. Mojica, FJM., Juez, G., and Rodriguez-Valera, F. Transcription at different salinities of  
567 *Haloferax mediterranei* sequences adjacent to partially modified PstI sites. *Mol.*  
568 *Microbiol.* 1993, 9, 613–621.
- 569 4. Mojica, FJM., Ferrer, C., Juez, G., and Rodriguez-Valera, F. Long stretches of short  
570 tandem repeats are present in the largest replicons of the Archaea *Haloferax*  
571 *mediterranei* and *Haloferax volcanii* and could be involved in replicon partitioning. *Mol.*  
572 *Microbiol.* 1995, 17, 85–93.
- 573 5. Mojica, FJM., DiezVillasenor, C., Garcia-Martinez, J., and Soria, E. Intervening sequences  
574 of regularly spaced prokaryotic repeats derive from foreign genetic elements. *J. Mol.*  
575 *Evol.* 2005, 60, 174–182.
- 576 6. Pourcel, C., Salviñol, G., and Vergnaud, G. (2005). CRISPR elements in *Yersinia pestis*  
577 acquire new repeats by preferential uptake of bacteriophage DNA, and provide  
578 additional tools for evolutionary studies. *Microbiology.* 2005, 151, 653–663.
- 579 7. Barrangou, R., Fremaux, C., Deveau, H., Richards, M., Boyaval, P., Moineau, S., Romero,



- 580 DA., and Horvath, P. CRISPR provides acquired resistance against viruses in prokaryotes.  
581 *Science* 2007, *315*, 1709–1712
- 582 8. Doudna JA, and Charpentier E. Genome editing: The new frontier of genome  
583 engineering with CRISPR-Cas9. *Science*. 2014, *28*;346(6 213):1258096
- 584 9. Lander ES The Heroes of CRISPR. *Cell* 2016, Jan 14, *164*(1-2). 18-28.
- 585 10. Doudna JA and Sternberg SH A Crack in Creation: gene editing and the unthinkable  
586 power to control creation. Houghton Mifflin Harcourt. 2017
- 587 11. Urnov FD Genome Editing B. C. (Before CRISPR): Lasting Lessons from the “Old  
588 Testament”. *The CRISPR Journal*; 2018; *1*(1): 34-46.
- 589 12. Hummon NP, Doreian P. Connectivity in a citation network: The development of DNA  
590 theory. *Social Networks* 1989; *11* (1):39-63.
- 591 13. Verspagen B, Mapping technological trajectories as patent citation networks: A study on  
592 fuel cell research. *Advances in Complex Systems*: 2007;*10*(01): 93-115.
- 593 14. Mina A, Ramlogan R, Tampubolon G, Metcalfe JS. Mapping evolutionary trajectories:  
594 Applications to the growth and transformation of medical knowledge. *Research Policy*  
595 2007; *36*(5): 789-806.
- 596 15. Martenelli A, Normaler O. Measuring knowledge persistence: a genetic approach to  
597 patent citation networks. *Journal of Evolutionary Economics*. 2014; *24*(3): 623-652.
- 598 16. Martenelli A. An emerging paradigm or just another trajectory? Understanding the  
599 nature of technological changes using engineering heuristics in the telecommunications  
600 switching industry. *Research Policy*. 2012; *41*(2): 414-429.
- 601 17. Park H, Magee CL. Tracing technological development trajectories: a genetic knowledge  
602 persistence-based main path approach. *PLOS ONE* 2017; *12*(1): 1-18.
- 603 18. Benson CL, Magee CL. A hybrid keyword and patent class methodology for selecting  
604 relevant sets of patents for a technological field. *Scientometrics*. 2013; *96*(1):69-82.
- 605 19. Benson CL, Magee CL. Technological structural implications from the extension of a  
606 patent search method. *Scientometrics*. 2015; *102*(3): 1965-1985.
- 607 20. Moore GE. Cramming more components onto integrated circuits. *Electronics Magazine*.  
608 1965 *38*(8).
- 609 21. Martino JP. Examples of technological forecasting for research and development.  
610 *Technological Forecasting and Social Change*. 1970 *2* (3/4) 247-260.
- 611 22. Nordhaus WD. Do real-output and real-wage measures capture reality? The history of  
612 lighting suggests not. In *Economics of new goods*: University of Chigo Press: 1997  
613 chapter 1. 27-70.
- 614 23. Koh H, Magee CL. A functional approach to technological progress: application to  
615 information technology. *Tech. Forecast. Soc. Change*. 2006; *73*: 1061-1083.
- 616 24. Nordhaus WD. Two centuries of productivity growth in computing. *The Journal of*  
617 *Economic History*. 2007; *67*(1) 128-159
- 618 25. Koh H. Magee CL, The extension of a functional approach to measuring technological  
619 progress to energy technology. *Technological Forecasting and Social Change*. 2008;  
620 *75*:735-758.
- 621 26. Koomey JG, Beard S, Sanchez H, Wong H, Assessing trends in the energy efficiency of  
622 computation over time. *IEEE ann. Hist. Comput*. 2011; 46-54

- 623 27. Nagy B, Farmer JD, Bui QM, Trancik JE. Statistical Basis for predicting technological  
624 progress. PLOS ONE: 2013; 8(2)1-7.
- 625 28. Magee CL, Basnet S, Funk JL, Benson CL. Quantitative empirical trends in technological  
626 performance. Technological Forecasting and Social Change: 2016; 104: 237-246.
- 627 29. Farmer JD, Lafond F. How predictable is technological progress? Research Policy: 2016;  
628 45(3) 647-665.
- 629 30. Barry M, Triulzi G, Magee CL. Food productivity trends from hybrid corn: statistical  
630 analysis of patents and field-test data. arXiv; 2017; arXiv:cs/030923
- 631 31. Benson CL, Magee CL. Quantitative determination of technological improvement from  
632 patent data. PlosOne: 2015; 10(4) e0121635
- 633 32. Benson CL, Magee CL. Using enhanced patent data in future-oriented technology  
634 analysis. Chapter 7 in Anticipating Future Innovation Pathways Through Large Data  
635 Analysis. Berlin: Springer International Publishing, 2016; pp. 119–131.
- 636 33. Triulzi G, Alstott J, Magee CL. Estimating performance improvement by mining patent  
637 data. SSRN: 2017; SSRN-id2987588.
- 638 34. Benson CL, Triulzi G, Magee CL. Is there a Moore's Law for 3D printing? 3D printing and  
639 additive manufacturing: 2018; 5(1) 53-62.
- 640 35. Patsnap. (2012). Patsnap patent search and analysis. Retrieved May 15, 2012, from  
641 <http://www.patsnap.com>.
- 642 36. Carroll D. Genome engineering with Zinc-finger nucleases. Genetics. 2011; August  
643 188(4):773-82.
- 644 37. Loenen WA, Dryden DT, Rayleigh EA, Wilson GG, Murray NE. Highlights of the DNA  
645 cutters: a short history of the restriction enzymes. Nucleic Acids Res. 2014; Jan 42 (1) 3-  
646 19.
- 647 38. Gaj T, Gersbach CA, Barbas CF. ZFN, TALEN and CRISPR-Cas9-based methods for genome  
648 engineering. Trends Biotechnol. 2013 Jul; 31 (7) 397-405.
- 649 39. Quetier F. The CRISPR-Cas9 technology: Closer to the ultimate toolkit for targeted  
650 genome editing. Plant Sci. 2016 Jan; 242:65-76.

| <p><b>(A)</b><br/> <b>Classes and period considered:</b><br/> <i>Component 1:</i><br/> UPC classes: 435/6.12 OR 435/455 OR 536/23.4 OR 435/196)<br/> CPC classes: C07K2319/81 OR C07K14/4702 OR C12Q1/6897 OR C12N9/22<br/> Time interval: 1970/01/01 – 2018/1/15</p> <p><i>Component 2:</i><br/> UPC classes:435/199<br/> AND<br/> CPC classes: C12N9/22<br/> Time interval: 1970/01/01 TO 2015/06/30</p> <p><i>Component 3:</i><br/> CPC classes: C12N9/22<br/> Time interval: 2015/07/01 TO 2017/06/30</p> | <p><b>(B)</b></p> <table border="0"> <thead> <tr> <th>Classes</th> <th>UPC Class Description</th> </tr> </thead> <tbody> <tr> <td>435/6.12</td> <td>..With Significant amplification...(Polymerase chain reaction (PCR))</td> </tr> <tr> <td>435/455</td> <td>Introduction of polynucleotide into or rearrangement of nucleic acid within animal cell</td> </tr> <tr> <td>536/23.4</td> <td>..... Encodes a fusion protein</td> </tr> <tr> <td>435/196</td> <td>..Acting on Easter bond</td> </tr> <tr> <td>435/199</td> <td>Ribonuclease</td> </tr> <tr> <td></td> <td><b>CPC Class Description</b></td> </tr> <tr> <td>C07K2319/81</td> <td>Containing Zn finger domain for DNA binding</td> </tr> <tr> <td>C07K14/4702</td> <td>Regulators; modulating activity</td> </tr> <tr> <td>C12Q1/6897</td> <td>involving reporter genes operably linked to promoters</td> </tr> <tr> <td>C12N9/22</td> <td>Ribonuclease</td> </tr> </tbody> </table> | Classes | UPC Class Description | 435/6.12 | ..With Significant amplification...(Polymerase chain reaction (PCR)) | 435/455 | Introduction of polynucleotide into or rearrangement of nucleic acid within animal cell | 536/23.4 | ..... Encodes a fusion protein | 435/196 | ..Acting on Easter bond | 435/199 | Ribonuclease |  | <b>CPC Class Description</b> | C07K2319/81 | Containing Zn finger domain for DNA binding | C07K14/4702 | Regulators; modulating activity | C12Q1/6897 | involving reporter genes operably linked to promoters | C12N9/22 | Ribonuclease |
|---------------------------------------------------------------------------------------------------------------------------------------------------------------------------------------------------------------------------------------------------------------------------------------------------------------------------------------------------------------------------------------------------------------------------------------------------------------------------------------------------------------|--------------------------------------------------------------------------------------------------------------------------------------------------------------------------------------------------------------------------------------------------------------------------------------------------------------------------------------------------------------------------------------------------------------------------------------------------------------------------------------------------------------------------------------------------------------------------------------------------------------------------------------------------------------------------------------------------------------------------------------------------------------------------------------------------------------------------------------------------------------------------------------------------------------------------------------------------|---------|-----------------------|----------|----------------------------------------------------------------------|---------|-----------------------------------------------------------------------------------------|----------|--------------------------------|---------|-------------------------|---------|--------------|--|------------------------------|-------------|---------------------------------------------|-------------|---------------------------------|------------|-------------------------------------------------------|----------|--------------|
| Classes                                                                                                                                                                                                                                                                                                                                                                                                                                                                                                       | UPC Class Description                                                                                                                                                                                                                                                                                                                                                                                                                                                                                                                                                                                                                                                                                                                                                                                                                                                                                                                            |         |                       |          |                                                                      |         |                                                                                         |          |                                |         |                         |         |              |  |                              |             |                                             |             |                                 |            |                                                       |          |              |
| 435/6.12                                                                                                                                                                                                                                                                                                                                                                                                                                                                                                      | ..With Significant amplification...(Polymerase chain reaction (PCR))                                                                                                                                                                                                                                                                                                                                                                                                                                                                                                                                                                                                                                                                                                                                                                                                                                                                             |         |                       |          |                                                                      |         |                                                                                         |          |                                |         |                         |         |              |  |                              |             |                                             |             |                                 |            |                                                       |          |              |
| 435/455                                                                                                                                                                                                                                                                                                                                                                                                                                                                                                       | Introduction of polynucleotide into or rearrangement of nucleic acid within animal cell                                                                                                                                                                                                                                                                                                                                                                                                                                                                                                                                                                                                                                                                                                                                                                                                                                                          |         |                       |          |                                                                      |         |                                                                                         |          |                                |         |                         |         |              |  |                              |             |                                             |             |                                 |            |                                                       |          |              |
| 536/23.4                                                                                                                                                                                                                                                                                                                                                                                                                                                                                                      | ..... Encodes a fusion protein                                                                                                                                                                                                                                                                                                                                                                                                                                                                                                                                                                                                                                                                                                                                                                                                                                                                                                                   |         |                       |          |                                                                      |         |                                                                                         |          |                                |         |                         |         |              |  |                              |             |                                             |             |                                 |            |                                                       |          |              |
| 435/196                                                                                                                                                                                                                                                                                                                                                                                                                                                                                                       | ..Acting on Easter bond                                                                                                                                                                                                                                                                                                                                                                                                                                                                                                                                                                                                                                                                                                                                                                                                                                                                                                                          |         |                       |          |                                                                      |         |                                                                                         |          |                                |         |                         |         |              |  |                              |             |                                             |             |                                 |            |                                                       |          |              |
| 435/199                                                                                                                                                                                                                                                                                                                                                                                                                                                                                                       | Ribonuclease                                                                                                                                                                                                                                                                                                                                                                                                                                                                                                                                                                                                                                                                                                                                                                                                                                                                                                                                     |         |                       |          |                                                                      |         |                                                                                         |          |                                |         |                         |         |              |  |                              |             |                                             |             |                                 |            |                                                       |          |              |
|                                                                                                                                                                                                                                                                                                                                                                                                                                                                                                               | <b>CPC Class Description</b>                                                                                                                                                                                                                                                                                                                                                                                                                                                                                                                                                                                                                                                                                                                                                                                                                                                                                                                     |         |                       |          |                                                                      |         |                                                                                         |          |                                |         |                         |         |              |  |                              |             |                                             |             |                                 |            |                                                       |          |              |
| C07K2319/81                                                                                                                                                                                                                                                                                                                                                                                                                                                                                                   | Containing Zn finger domain for DNA binding                                                                                                                                                                                                                                                                                                                                                                                                                                                                                                                                                                                                                                                                                                                                                                                                                                                                                                      |         |                       |          |                                                                      |         |                                                                                         |          |                                |         |                         |         |              |  |                              |             |                                             |             |                                 |            |                                                       |          |              |
| C07K14/4702                                                                                                                                                                                                                                                                                                                                                                                                                                                                                                   | Regulators; modulating activity                                                                                                                                                                                                                                                                                                                                                                                                                                                                                                                                                                                                                                                                                                                                                                                                                                                                                                                  |         |                       |          |                                                                      |         |                                                                                         |          |                                |         |                         |         |              |  |                              |             |                                             |             |                                 |            |                                                       |          |              |
| C12Q1/6897                                                                                                                                                                                                                                                                                                                                                                                                                                                                                                    | involving reporter genes operably linked to promoters                                                                                                                                                                                                                                                                                                                                                                                                                                                                                                                                                                                                                                                                                                                                                                                                                                                                                            |         |                       |          |                                                                      |         |                                                                                         |          |                                |         |                         |         |              |  |                              |             |                                             |             |                                 |            |                                                       |          |              |
| C12N9/22                                                                                                                                                                                                                                                                                                                                                                                                                                                                                                      | Ribonuclease                                                                                                                                                                                                                                                                                                                                                                                                                                                                                                                                                                                                                                                                                                                                                                                                                                                                                                                                     |         |                       |          |                                                                      |         |                                                                                         |          |                                |         |                         |         |              |  |                              |             |                                             |             |                                 |            |                                                       |          |              |
| <p><b>(C)</b></p> 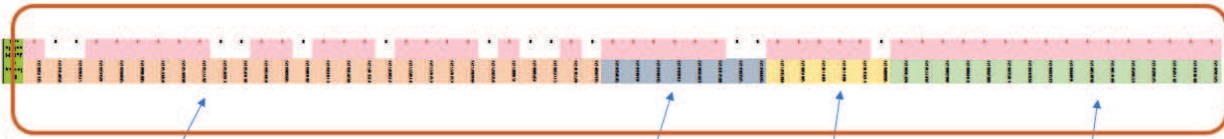 <p>Zn finger patents      TALEN patents      Mega nuclease patents      CRISPR patents</p>                                                                                                                                                                                                                                                                                                              |                                                                                                                                                                                                                                                                                                                                                                                                                                                                                                                                                                                                                                                                                                                                                                                                                                                                                                                                                  |         |                       |          |                                                                      |         |                                                                                         |          |                                |         |                         |         |              |  |                              |             |                                             |             |                                 |            |                                                       |          |              |
| <p><b>(D)</b></p> <p>Number of patents in genome engineering set = 1373<br/> % 58 key patents listed by the genome engineering set = 78%</p>                                                                                                                                                                                                                                                                                                                                                                  |                                                                                                                                                                                                                                                                                                                                                                                                                                                                                                                                                                                                                                                                                                                                                                                                                                                                                                                                                  |         |                       |          |                                                                      |         |                                                                                         |          |                                |         |                         |         |              |  |                              |             |                                             |             |                                 |            |                                                       |          |              |

(A)

### Patents granted yearly

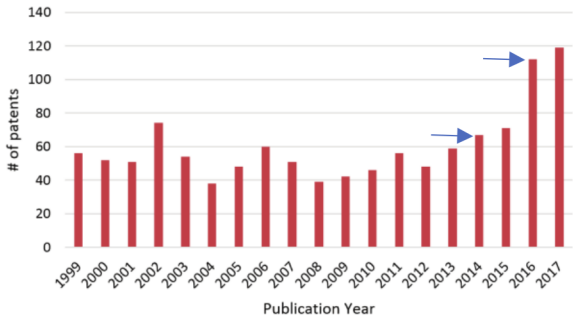

(B)

### Top Assignees

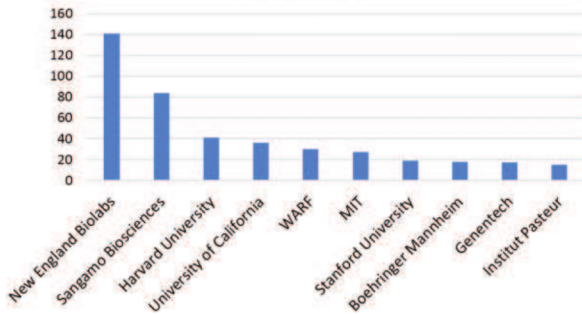

(A)

### Patents granted yearly

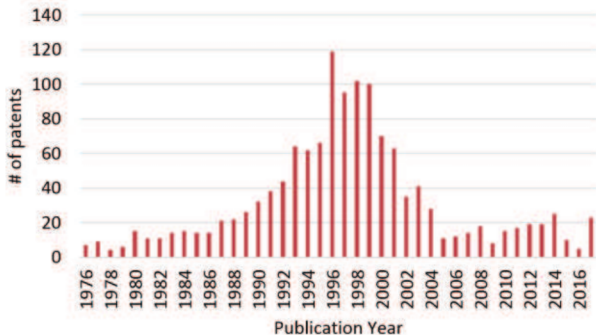

(B)

### Top Assignees

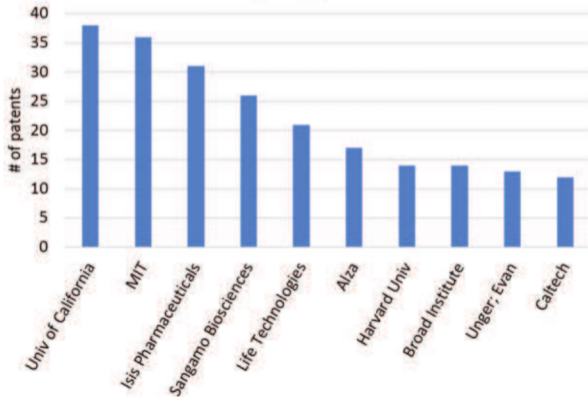

***Collecting patent set for a technological domain***

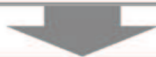

***Constructing patent citation network within the domain***

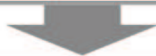

***Measuring knowledge persistence***

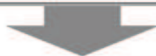

***Tracing main paths from high persistence patents***



| Node # | Publication Number | Node # | Publication Number |
|--------|--------------------|--------|--------------------|
| 1      | US3956064          | 18     | US8563314          |
| 2      | US4080261          | 19     | US9616090          |
| 3      | US4161424          | 20     | US9833479          |
| 4      | US4542099          | 21     | US8420782          |
| 5      | US4668631          | 22     | US9458205          |
| 6      | US4975376          | 23     | US9783827          |
| 7      | US5147794          | 24     | US9487768          |
| 8      | US5405768          | 25     | US9758797          |
| 9      | US5356802          | 26     | US8586526          |
| 10     | US6534261          | 27     | US9464285          |
| 11     | US5436150          | 28     | US9657282          |
| 12     | US5916794          | 29     | US5498535          |
| 13     | US5200333          | 30     | US6413758          |
| 14     | US5792640          | 31     | US6893854          |
| 15     | US6265196          | 32     | US7052897          |
| 16     | US7163824          | 33     | US5885818          |
| 17     | US8034598          | 34     | US8628945          |

○ High persistence

○ Low persistence

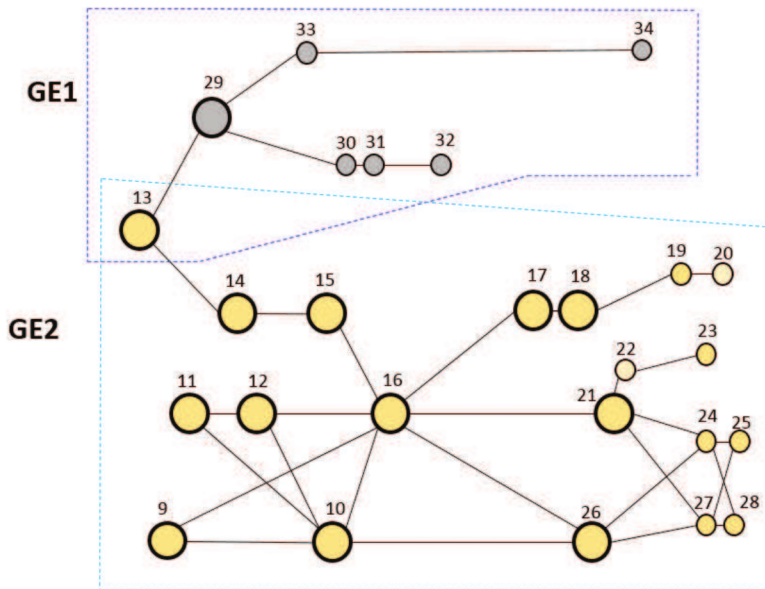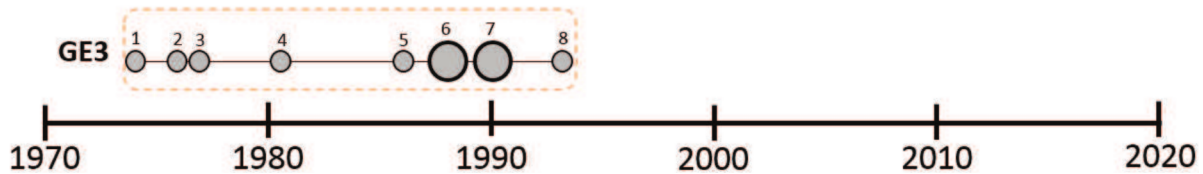

| <b>Technology Clusters</b> |                                                        |
|----------------------------|--------------------------------------------------------|
| <b>A</b>                   | General RE production technology                       |
| <b>B</b>                   | Separation of RE & DNA binding domains                 |
| <b>C</b>                   | Hybrid RE & genome engineering                         |
| <b>D</b>                   | Zinc-finger nuclease (ZFN)                             |
| <b>E</b>                   | Therapeutic application of ZFN, TALEN or CRISPR        |
| <b>F</b>                   | Transcription activator-like effector nuclease (TALEN) |
| <b>G</b>                   | Extending genome engineering to RNA level regulation   |

| Node # | Publication Number | Node # | Publication Number |
|--------|--------------------|--------|--------------------|
| 9      | US5356802          | 19     | US9616090          |
| 10     | US6534261          | 20     | US9833479          |
| 11     | US5436150          | 21     | US8420782          |
| 12     | US5916794          | 22     | US9458205          |
| 13     | US5200333          | 23     | US9783827          |
| 14     | US5792640          | 24     | US9487768          |
| 15     | US6265196          | 25     | US9758797          |
| 16     | US7163824          | 26     | US8586526          |
| 17     | US8034598          | 27     | US9464285          |
| 18     | US8563314          | 28     | US9657282          |

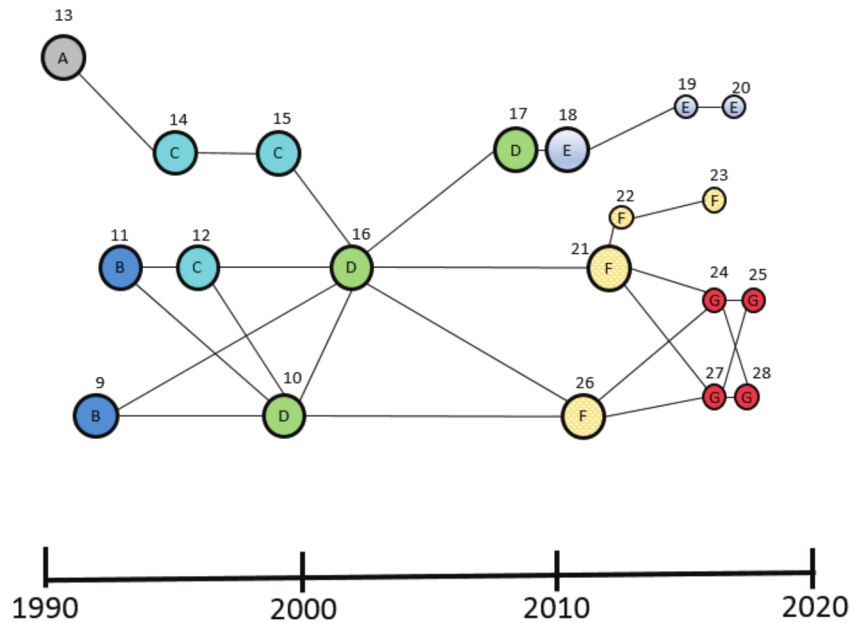

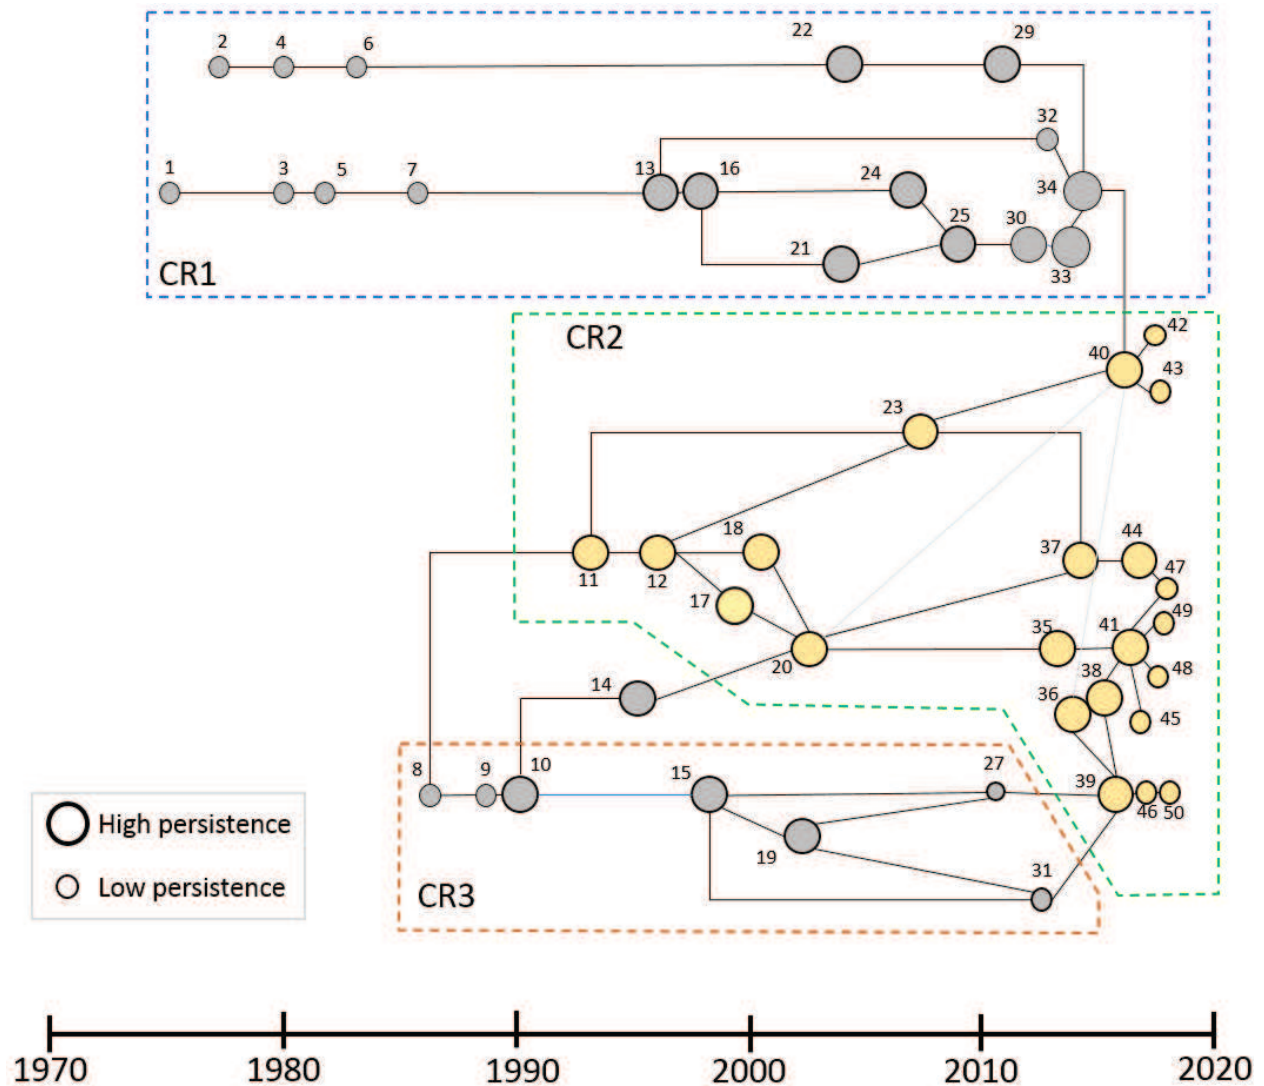

| Node # | Publication Number | Node # | Publication Number | Node # | Publication Number | Node # | Publication Number | Node # | Publication Number |
|--------|--------------------|--------|--------------------|--------|--------------------|--------|--------------------|--------|--------------------|
| 1      | US3996345          | 11     | US5223409          | 21     | US6716882          | 31     | US8361725          | 41     | US9410198          |
| 2      | US4089801          | 12     | US5498530          | 22     | US6815432          | 32     | US8414927          | 42     | US9567603          |
| 3      | US4193983          | 13     | US5585112          | 23     | US7163824          | 33     | US8466122          | 43     | US9567604          |
| 4      | US4235871          | 14     | US5674738          | 24     | US7166745          | 34     | US8680069          | 44     | US9580727          |
| 5      | US4310505          | 15     | US5753467          | 25     | US7479573          | 35     | US8685737          | 45     | US9677090          |
| 6      | US4394448          | 16     | US5830430          | 26     | US7915450          | 36     | US8697359          | 46     | US9725714          |
| 7      | US4603044          | 17     | US6007988          | 27     | US7919277          | 37     | US8841260          | 47     | US9745562          |
| 8      | US4683202          | 18     | US6013453          | 28     | US8058068          | 38     | US8945839          | 48     | US9745600          |
| 9      | US4889818          | 19     | US6395475          | 29     | US8058069          | 39     | US9260752          | 49     | US9803194          |
| 10     | US4965188          | 20     | US6453242          | 30     | US8158827          | 40     | US9322037          | 50     | US9809814          |
